# Supplementary material for: Multi-Omics Characterization of Colon Mucosa and Submucosa/Wall from Crohn’s Disease Patients
Source: MDPI journal article supplement (doi:10.3390/ijms25105108), 2024-05-08
Supplement: s1 [file s1]

Supplementary Table S1. Scoring for human clinical samples based on histology for severity of disease in mucosa and submucosa/wall (score 0-4, 4 most severe). Path comments specified presence of absence of tertiary lymphoid organs (TLOs) in histologic sections.

| #  | Group        | Path score mucosa | Path score wall | Path comments |
|----|--------------|-------------------|-----------------|---------------|
| 1  | Inflamed     | 4 ulcerated       | 3               | no TLOs       |
| 2  | Inflamed     | 3                 | 3               | no TLOs       |
| 3  | Inflamed     | 3-4               | 4               | TLOs          |
| 4  | Inflamed     | 3                 | 3               | no TLOs       |
| 5  | Inflamed     | 4                 | 4               | TLOs          |
| 6  | Inflamed     | 3                 | 4               | TLOs          |
| 7  | Inflamed     | 4                 | 4               | TLOs          |
| 8  | Inflamed     | 4                 | 4               | no TLOs       |
| 9  | Inflamed     | 4                 | 4               | TLOs          |
| 10 | Inflamed     | 3                 | 4               | TLOs          |
| 1  | Non-inflamed | 0                 | 0               |               |
| 2  | Non-inflamed | 0                 | 0               |               |
| 3  | Non-inflamed | 0                 | 0               |               |
| 4  | Non-inflamed | 0-1               | 0-1             |               |
| 5  | Non-inflamed | 1                 | 1 GALT          |               |
| 6  | Non-inflamed | 2                 | 0               |               |
| 7  | Non-inflamed | 2                 | 1 GALT          |               |
| 8  | Non-inflamed | 1                 |                 |               |
| 9  | Non-inflamed | 1                 | 1               |               |
| 1  | Normal       | 0                 | 0               |               |
| 2  | Normal       | 0                 | 0               |               |
| 3  | Normal       | 1                 | 0               |               |
| 4  | Normal       | 0                 | 0               |               |
| 5  | Normal       | 0-1               | 0               |               |
| 6  | Normal       | 0                 | 0               |               |
| 7  | Normal       | 1                 | 1               |               |
| 8  | Normal       | 0                 | 0               |               |
| 9  | Normal       | 1                 | 0               |               |
| 10 | Normal       | 1                 | 0               |               |
