# Supplementary figures and images for: Multi-Omics Characterization of Colon Mucosa and Submucosa/Wall from Crohn’s Disease Patients
Source: MDPI journal article supplement (doi:10.3390/ijms25105108), 2024-05-08

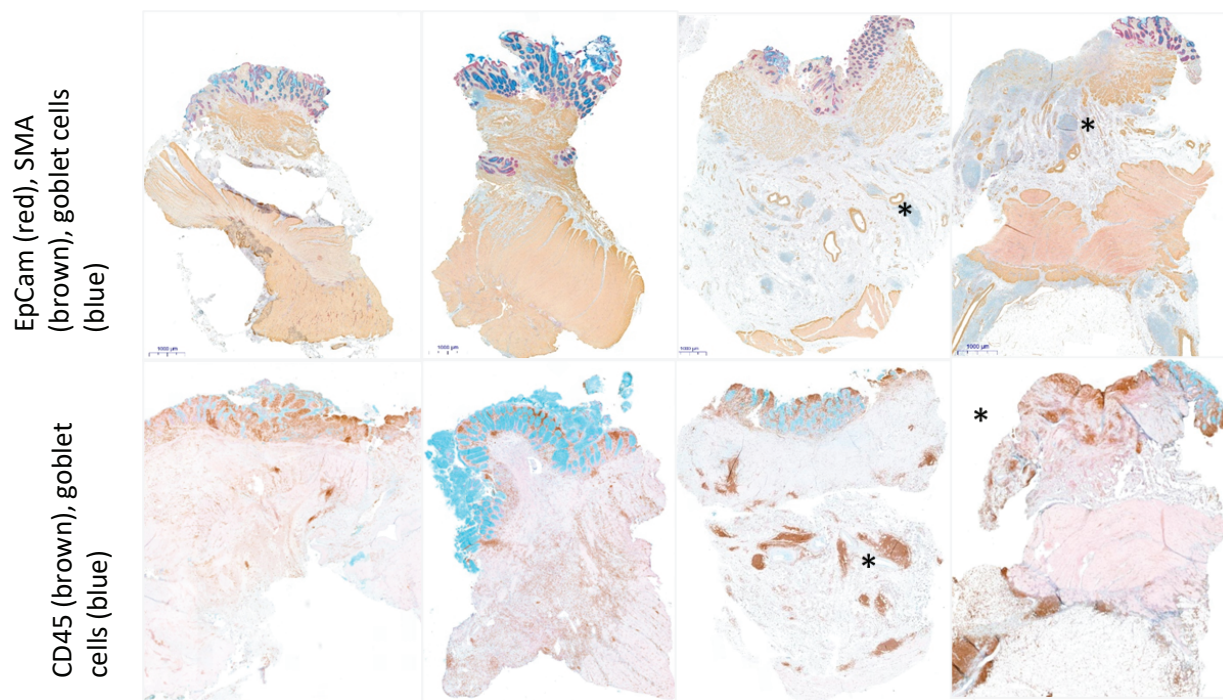

**Figure S1:** Pathological alterations in Crohn's disease mucosa and wall.

Supplement: s1 [file s1]
